# Supplementary material for: Dogs as Sentinels for Flavivirus Exposure in Urban, Peri-Urban and Rural Hanoi, Vietnam
Source: PubMed Central journal article supplement (PMC8003331; doi:10.3390/v13030507), 2021-03-19
Supplement: viruses-13-00507-s001.pdf [file viruses-13-00507-s001.pdf]

## Household questionnaire

### INTRODUCTION

Good morning / Good afternoon. My name is \_\_\_\_\_ and I work for the International Livestock Research Institute (ILRI), which is based in Hanoi. We are conducting a study on how the presence of mosquitoes is affected by the keeping of livestock in urban environments. This study has three parts: 1) a survey to help understand the benefits and risks of urban livestock keeping and the awareness on mosquito-borne diseases; 2) to collect mosquitoes and investigate if the mosquitoes are infected with flaviviruses and, 3) to take blood samples from the livestock at household. We are visiting you because your household has been selected randomly to participate in the study titled “**The association between livestock keeping and mosquito-borne diseases in urban Hanoi**”. If you accept to participate in this study, we will ask you a number of questions related to your household, knowledge and practice of livestock keeping and awareness about mosquito-borne diseases. We will also request you to get the consent to place mosquito traps on your land and take animal’s blood for further laboratory analysis.

#### **Potential risks**

Your participation in this evaluation has no physical risk. We maintain strict control of all the information gained.

#### **Potential benefits**

This is an important study to control the burden of neglected tropical diseases such as dengue fever in the community.

#### **Confidentiality**

The research team promises to respect privacy and confidentiality of your information. This information will only be shared among our research team members, but we will remove all names so that no one will be able to trace back the information to you. If you voluntarily participate in this study, you may withdraw at any time without any consequences of any kind. You may also use the option of removing your data from the study. You may also refuse to answer any questions you don’t want to answer and still remain in the study. The investigator may withdraw you from this research if circumstances arise that warrant doing so. You are not waiving any legal claims, rights or remedies because of your participation in this research study.

If you have any questions now or later you are welcome to call the researchers:

- **Dr Johanna Lindahl**                      01675340452 (English)
  - **Mr. Nguyen Tien Thang**              0981582712 (Vietnamese)
- If you have questions regarding your rights as a research participant, contact:

**Institutional Review Board**, Room 103 Building A – Hanoi University of Public Health. No 1A, Duc Thang str, Duc Thang ward, Bac Tu Liem district, HaNoi  
Tel: 024 6266 3024. Email: [irb@huph.edu.vn](mailto:irb@huph.edu.vn)

**Questionnaire ID**

ID consists of 5 letters. The first two is district code, 3 remainings are household ID.

District code: **01** – Chuong My, **02** – Dan Phuong, **03** – Bac Tu Liem, **04** – Ha Dong

**05** – Ba Dinh, **06** – Cau Giay

| No | A. General information                       |                                                                                         |                        | Note |
|----|----------------------------------------------|-----------------------------------------------------------------------------------------|------------------------|------|
| A1 | Gender                                       | Male<br>Female                                                                          | 1<br>2                 |      |
| A2 | Age                                          | _____                                                                                   |                        |      |
| A3 | Highest level of education                   | College/university<br>High school<br>Secondary school<br>Primary school<br>No education | 4<br>3<br>2<br>1<br>0  |      |
| A4 | Marriage status                              | Single<br>Married<br>Separated/Divorced<br>Widowed<br>Others: .....                     | 1<br>2<br>3<br>4<br>99 |      |
| A5 | Main occupation                              | Officer<br>Farmer<br>Unemployed<br>Retired<br>Others: .....                             | 1<br>2<br>3<br>4<br>99 |      |
| A6 | Number of people in the household            | _____                                                                                   |                        |      |
| A7 | Number of children under 15 in the household | _____                                                                                   |                        |      |
| A8 | Sources of water using in your family        | Tap water<br>Rain water                                                                 | 1<br>2                 |      |

|           |                                                                     |                                                                                                                             |                             |                  |
|-----------|---------------------------------------------------------------------|-----------------------------------------------------------------------------------------------------------------------------|-----------------------------|------------------|
|           | <i>(You can choose more than 1 option)</i>                          | Rivers/lakes nearby                                                                                                         | 3                           |                  |
|           |                                                                     | Well                                                                                                                        | 4                           |                  |
|           |                                                                     | Others: .....                                                                                                               | 5                           |                  |
| A9        | Type of toilet/sanitation system in your family                     |                                                                                                                             |                             |                  |
| A10       | Average income per month of your family in total                    | _____ VND                                                                                                                   |                             |                  |
| <b>No</b> | <b>B. Livestock information</b>                                     |                                                                                                                             |                             | <b>Note</b>      |
| B0        | Is your family keeping livestock?                                   | Yes<br>No                                                                                                                   | 1<br>0                      | <b>Go to B2</b>  |
| B1        | Why do you not keep livestock?<br>(for household with no livestock) | Lack of space<br>No time<br>Not interested<br>No/limited knowledge<br>Concern about hygiene and sanitation<br>Others: ..... | 1<br>2<br>3<br>4<br>5<br>99 | <b>Go to B10</b> |
| B2        | Number of livestock last year                                       | Pig _____<br>Goat _____<br>Chicken _____<br>Cattle _____<br>Duck _____<br>Goose _____<br>Others: _____<br>_____             |                             |                  |
| B3        | Number of livestock this year                                       | Pig _____<br>Goat _____<br>Chicken _____<br>Cattle _____<br>Duck _____<br>Goose _____<br>Others: _____<br>_____             |                             |                  |

|     |                                                                                        |                                                                                                                                                                                                                                 |                                            |                 |
|-----|----------------------------------------------------------------------------------------|---------------------------------------------------------------------------------------------------------------------------------------------------------------------------------------------------------------------------------|--------------------------------------------|-----------------|
| B4  | Type of keeping livestock                                                              | Indoor<br>Tied up, partly outdoor<br>Fenced/shed in outdoor<br>Free roaming<br>Others: .....                                                                                                                                    | 1<br>2<br>3<br>4<br>99                     |                 |
| B5  | Who is mainly responsible for keeping livestock in your home                           | Grandfather/grandmother<br>Husband<br>Wife<br>Children<br>Others: .....                                                                                                                                                         | 1<br>2<br>3<br>4<br>99                     |                 |
| B6  | Have your livestock get any diseases last year?                                        | Yes<br>No                                                                                                                                                                                                                       | 1<br>0                                     | <b>Go to B8</b> |
| B7  | If yes, can you describe the symptoms or name the diseases?                            | _____                                                                                                                                                                                                                           |                                            |                 |
| B8  | How do you usually treat when the livestock got diseases?                              | _____                                                                                                                                                                                                                           |                                            |                 |
| B9  | Why do you keep livestock?<br>(Benefits)<br><i>(You can choose more than 1 option)</i> | Provide livelihood options<br>Reduce cost and time of transportation<br>Food production<br>Recycling animal waste<br>Provide the education facilities<br>Poverty alleviation<br>Income generation<br>Pleasures<br>Others: ..... | 1<br>2<br>3<br>4<br>5<br>6<br>7<br>8<br>99 |                 |
| B10 | Problems and risks of livestock keeping for all households                             | Unpleasant smells and noises<br>Contamination in water resource<br>Affect the environment/ecosystem<br>Animal health problems                                                                                                   | 1<br>2<br>3<br>4                           |                 |

|            |                                                                                                                     |                                                                                                                       |                                  |             |
|------------|---------------------------------------------------------------------------------------------------------------------|-----------------------------------------------------------------------------------------------------------------------|----------------------------------|-------------|
|            |                                                                                                                     | Feed supply                                                                                                           | 5                                |             |
|            |                                                                                                                     | Theft                                                                                                                 | 6                                |             |
|            |                                                                                                                     | Inappropriate waste/manure management                                                                                 | 7                                |             |
|            |                                                                                                                     | Bring the diseases to human                                                                                           | 8                                |             |
|            |                                                                                                                     | Low production                                                                                                        | 9                                |             |
|            |                                                                                                                     | Others: .....                                                                                                         | 99                               |             |
| B11        | Do you have any pets or other animals in your household?                                                            | Cats _____<br>Dogs _____<br>Songbird _____<br>Other pets _____                                                        |                                  |             |
| B12        | Do you know any disease that humans can get from animals?<br><i>(You can choose more than 1 option)</i>             | Don't know any<br>Rabies<br>Japanese encephalitis<br>Tuberculosis<br>Brucellosis<br>Streptococcus suis<br>Other _____ | 0<br>1<br>2<br>3<br>4<br>5<br>99 |             |
| <b>STT</b> | <b>C. Awareness about mosquito-borne diseases</b>                                                                   |                                                                                                                       |                                  | <b>Note</b> |
| C1         | Have you heard about diseases being transmitted from mosquitoes to humans                                           | Yes<br>No                                                                                                             | 1<br>0                           | Go to C3    |
| C2         | If yes, can you list the disease(s) that transmitted from mosquitoes?<br><i>(You can choose more than 1 option)</i> | Dengue fever<br>Japanese Encephalitis<br>Zika<br>Malaria<br>Filariasis<br>Others: .....                               | 1<br>2<br>3<br>4<br>5<br>99      |             |
| C3         | Can you list breeding sites of mosquitoes?<br><i>(You can choose more than 1 option)</i>                            | Don't know<br>Clean water<br>Drain/polluted water<br>Stagnant water containers                                        | 1<br>2<br>3<br>4                 |             |

|    |                                                                                                                               |                                   |    |  |
|----|-------------------------------------------------------------------------------------------------------------------------------|-----------------------------------|----|--|
|    |                                                                                                                               | Tires                             | 5  |  |
|    |                                                                                                                               | Water tanks                       | 6  |  |
|    |                                                                                                                               | Vase                              | 7  |  |
|    |                                                                                                                               | Bonsai rockery                    | 8  |  |
|    |                                                                                                                               | Others: .....                     | 99 |  |
| C4 | Can you list the risk factors for getting mosquito-borne diseases?<br><i>(You can choose more than 1 option)</i>              | Don't know any                    | 0  |  |
|    |                                                                                                                               | Warm and humid season             | 1  |  |
|    |                                                                                                                               | High population density           | 2  |  |
|    |                                                                                                                               | Stagnant water                    | 3  |  |
|    |                                                                                                                               | Livestock keeping                 | 4  |  |
|    |                                                                                                                               | Others: .....                     | 99 |  |
| C5 | Can you list the symptoms while getting mosquito-borne diseases?<br><i>(You can choose more than 1 option)</i>                | Don't know any                    | 0  |  |
|    |                                                                                                                               | High fever                        | 1  |  |
|    |                                                                                                                               | Muscle pains                      | 2  |  |
|    |                                                                                                                               | Nausea/vomiting                   | 3  |  |
|    |                                                                                                                               | Severe headache                   | 4  |  |
|    |                                                                                                                               | Rash                              | 5  |  |
|    |                                                                                                                               | Bleeding                          | 6  |  |
|    |                                                                                                                               | Others: .....                     | 99 |  |
| C6 | In which season mosquito-borne diseases are highest?                                                                          | Rainy season                      | 1  |  |
|    |                                                                                                                               | Dry season                        | 2  |  |
|    |                                                                                                                               | Same                              | 3  |  |
| C7 | Can you list the ways to prevent yourself from getting mosquito-borne diseases?<br><i>(You can choose more than 1 option)</i> | Don't know any                    | 0  |  |
|    |                                                                                                                               | Screening of doors/windows        | 1  |  |
|    |                                                                                                                               | Mosquito repellent creams/ liquid | 2  |  |
|    |                                                                                                                               | Mosquito nets                     | 3  |  |
|    |                                                                                                                               | Electric rackets                  | 4  |  |
|    |                                                                                                                               | Mosquito coils / Incense sticks   | 5  |  |
|    |                                                                                                                               | Long sleeves                      | 6  |  |
|    |                                                                                                                               | Keep lids on water tanks          | 7  |  |
|    |                                                                                                                               | Chemical in water containers      | 8  |  |

|     |                                                                                                                                         |                                            |    |                  |
|-----|-----------------------------------------------------------------------------------------------------------------------------------------|--------------------------------------------|----|------------------|
|     |                                                                                                                                         | Anti-mosquito products (e.g. insecticides) | 9  |                  |
|     |                                                                                                                                         | Eliminate breeding sites                   | 10 |                  |
|     |                                                                                                                                         | Using fish in water containers             | 11 |                  |
|     |                                                                                                                                         | Others: .....                              | 99 |                  |
| C8  | Which personal protection do you use to prevent mosquito-borne diseases?<br><i>(You can choose more than 1 option)</i>                  | Don't use any measures                     | 0  | <b>Go to C10</b> |
|     |                                                                                                                                         | Screening of windows/doors                 | 1  |                  |
|     |                                                                                                                                         | Mosquito repellent creams/ liquid          | 2  |                  |
|     |                                                                                                                                         | Mosquito nets                              | 3  |                  |
|     |                                                                                                                                         | Electric rackets                           | 4  |                  |
|     |                                                                                                                                         | Mosquito coils / Incense sticks            | 5  |                  |
|     |                                                                                                                                         | Long sleeves                               | 6  |                  |
|     |                                                                                                                                         | Keep lids on water tanks                   | 7  |                  |
|     |                                                                                                                                         | Chemical in water containers               | 8  |                  |
|     |                                                                                                                                         | Anti-mosquito products (e.g. insecticides) | 9  |                  |
|     |                                                                                                                                         | Eliminate breeding sites                   | 10 |                  |
|     |                                                                                                                                         | Using fish in water containers             | 11 |                  |
|     |                                                                                                                                         | Others: .....                              | 99 |                  |
| C9  | Frequency of using personal protection to prevent mosquito-borne diseases?                                                              | Only at night                              | 1  |                  |
|     |                                                                                                                                         | Only during the day                        | 2  |                  |
|     |                                                                                                                                         | Throughout 24h                             | 3  |                  |
|     |                                                                                                                                         | Few days a week                            | 4  |                  |
|     |                                                                                                                                         | Others: .....                              | 99 |                  |
| C10 | What are the sources of the information you have heard about the mosquito-borne diseases?<br><i>(You can choose more than 1 option)</i> | Never heard                                | 0  |                  |
|     |                                                                                                                                         | TV                                         | 1  |                  |
|     |                                                                                                                                         | Broadcast                                  | 2  |                  |
|     |                                                                                                                                         | Loudspeaker                                | 3  |                  |
|     |                                                                                                                                         | Internet                                   | 4  |                  |
|     |                                                                                                                                         | Communication materials                    | 5  |                  |
|     |                                                                                                                                         | Health staffs                              | 6  |                  |
|     |                                                                                                                                         | Friends                                    | 7  |                  |
|     |                                                                                                                                         | School                                     | 8  |                  |

|     |                                                                                           |                                                                                                                              |                                            |            |
|-----|-------------------------------------------------------------------------------------------|------------------------------------------------------------------------------------------------------------------------------|--------------------------------------------|------------|
|     |                                                                                           | Other :.....                                                                                                                 | 99                                         |            |
| C11 | Which sources of information you like most?<br><i>(You can choose more than 1 option)</i> | TV<br>Broadcast<br>Loudspeaker<br>Internet<br>Communication materials<br>Health staffs<br>Friends<br>School<br>Others :..... | 1<br>2<br>3<br>4<br>5<br>6<br>7<br>8<br>99 |            |
| C12 | Have you or your family members ever get mosquito-borne diseases during the last 2 years? | Yes<br>No                                                                                                                    | 1<br>0                                     | <b>End</b> |
| C13 | Which disease(s) has/have been diagnosed?                                                 | Dengue fever<br>Japanese Encephalitis<br>Malaria<br>No disease was diagnosed<br>Others :.....                                | 1<br>2<br>3<br>4<br>99                     |            |
| C14 | Source of treatments for that disease                                                     | Public medical system<br>Private practitioner<br>Self – medication<br>No treatment<br>Others :.....                          | 1<br>2<br>3<br>0<br>99                     |            |
